# Supplementary material
Source: bioRxiv or medRxiv preprint supplement (https://medrxiv.org/highwire/filestream/90282/field_highwire_adjunct_files/0/2020.07.17.20140533-1.pdf)
Supplement: Supplementary file [file 2020.07.17.20140533-1.pdf]

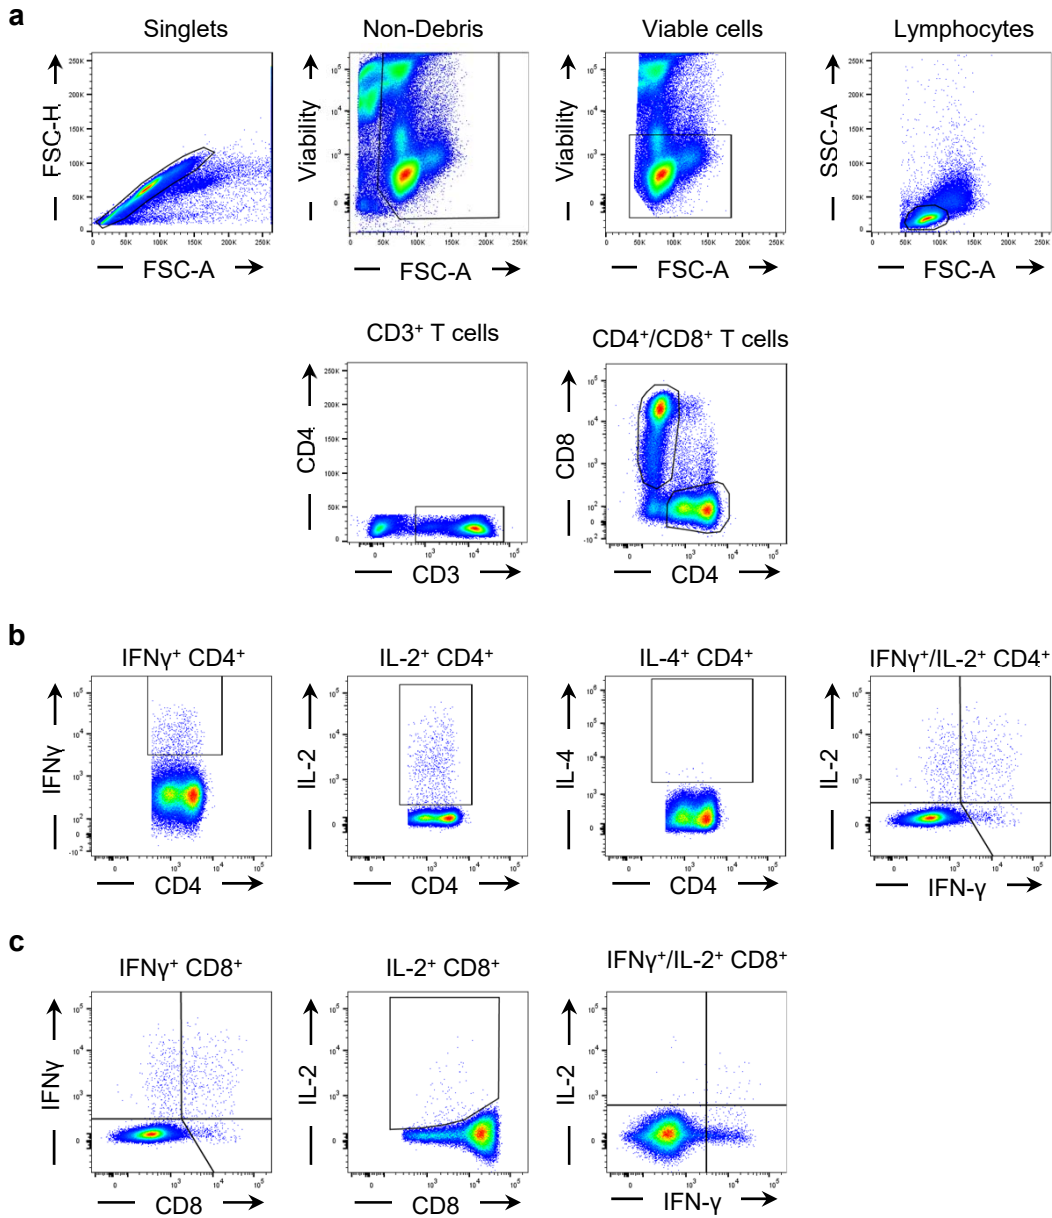

**Supplementary Figure 1 | Gating strategy for flow cytometry analysis of data shown in Figure 4.**

Flow cytometry gating strategy for identification of IFN $\gamma$ , IL-2 and IL-4 secreting T cells in study subject PBMC samples. **a**, CD4<sup>+</sup> and CD8<sup>+</sup> T cells were gated within single, viable lymphocytes. **b**, **c**, Gating of IFN $\gamma$ , IL-2 and IL-4 in CD4<sup>+</sup> T cells (**b**), and IFN $\gamma$  and IL-2 in CD8<sup>+</sup> T cells (**c**).
